# Supplementary material
Source: PubMed Central journal article supplement (PMC6129124)
Supplement: jciinsight-3-98720-s077.pdf [file jciinsight-3-98720-s077.pdf]

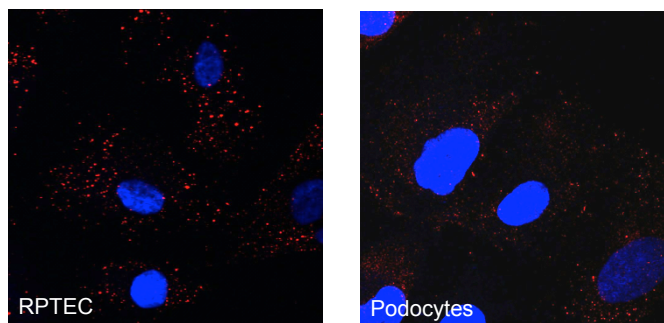

**Supplemental Figure 1. Human cultured podocytes constitutively express SGLT2.** Representative images of SGLT2 membrane expression (red) in RPTEC used as positive controls (left) and control podocytes (right) under basal conditions. Nuclei were counterstained with DAPI (blue). Original magnification (X630).

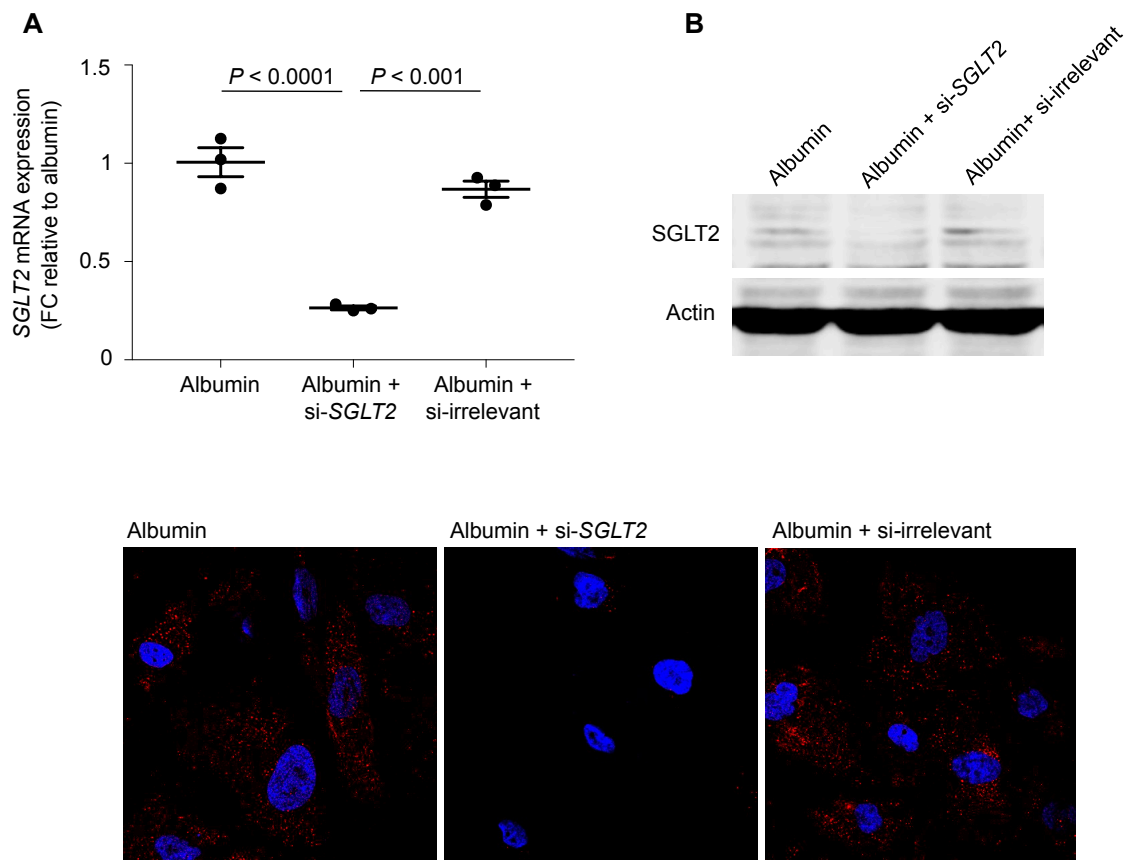

**Supplemental Figure 2. Gene silencing of *SGLT2* in human cultured podocytes** (A) *SGLT2* mRNA expression evaluated by qRT-PCR analysis in podocytes transfected with *SGLT2* siRNA (si-*SGLT2*; 15 nM) or irrelevant siRNA (si-irrelevant; 15 nM) for 24 hours before albumin (10 mg/ml) stimulation (3 hours). *HPRT1* was used as endogenous control. *SGLT2* levels were normalized to *HPRT1* levels and reported as fold change relative to podocytes (untransfected) exposed to albumin. Data are mean  $\pm$  SEM (n=3 samples) and analyzed by ANOVA with Tukey post hoc test. (B) Representative Western blot of *SGLT2* protein in podocytes transfected with si-*SGLT2* (15 nM) or si-irrelevant (15 nM) for 24 hours before albumin (10 mg/ml) stimulation (6 hours). Actin was used as sample loading control. (C) Representative images of *SGLT2* membrane expression in podocytes transfected with *SGLT2* or irrelevant siRNA before albumin stimulation (3 hours). Nuclei were counterstained with DAPI (blue). Original magnification (X630).

**A**

**Sequencing primer forward**

481 gatctcagtg gacatgttct cgggagctgt attcatccag caggctctgg gctggaacat  
541 ctatgcctcc gtcacgcgc tctgggcat caccatgatt tacacgggta caggaggct  
601 ggcgcgctg atgtacacgg acacggtaca gacctcgtc attctggggg gcgcctgcat

Exon 6-7 junction  
**qRT-PCR primer forward**

661 cctcatgggt tacctcttcc acgaggtggg cgggtattcg ggtctcttcg acaaatcct

**qRT-PCR primer reverse**

721 gggagcagcg acttcgctga cgggtccga ggatccagcc gtgggaaaca tctccagctt  
781 ctgctatcga ccccgcccg actcctacca cctgctccgg caccctgga ccggggatct

**Sequencing primer reverse**

841 gccgtggccc gcgctgctcc tcggactcac aatcgtctcg ggctgggtact ggtgcagcga

**B**

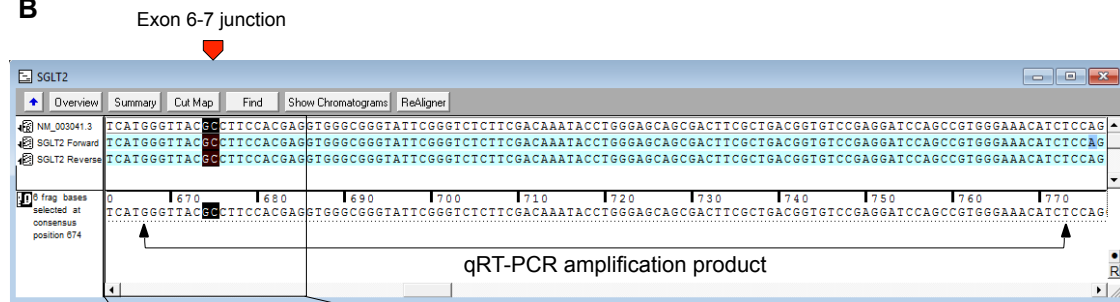

**C**

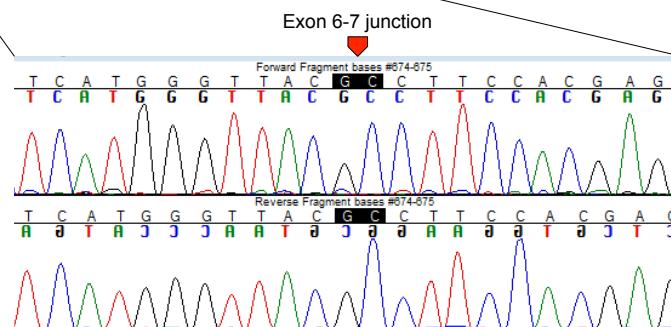

**Supplemental Figure 3. (A)** The portion of human solute carrier family 5 member 2 (*SLC5A2*; *SGLT2*), transcript variant 1, mRNA reference sequence (NM\_003041.3 at National Center of Biotechnology Information) which comprises the qRT-PCR product (highlighted in grey). Exon 6-7 junction is indicated by red arrow. The position and sequence of qRT-PCR *SGLT2* primers and sequencing primers is indicated. **(B)** Starting from podocyte cDNA, a portion of *SGLT2* was amplified and sequenced in the two directions on ABI 3730 DNA analyser. Alignment of the sequences corresponding to the qRT-PCR amplification product with the *SGLT2* mRNA reference sequence. The inset shows the chromatograms relative to the region that includes exon 6-7 junction.
